# Supplementary material for: Advancing the Assessment of Mindfulness-Based Meditation Practice: Psychometric Evaluation of the Mindfulness Adherence Questionnaire
Source: Springer Nature journal article supplement (doi:10.1007/s10608-020-10150-z), 2020-09-14
Supplement: MOESM1 [file 18375286]

# Advancing the Assessment of Mindfulness-Based Meditation Practice: Psychometric Evaluation of the Mindfulness Adherence Questionnaire

Supplementary Information

Tables 1 and 2

| **Supplementary Information**  Table 1  *Sample Characteristics* | | |
| --- | --- | --- |
| Variable | *Study 1*  *N* = 282 | *Study 2*  *N* = 55 |
| Age, in years, *M* (*SD*) | 18.50 (0.98) | 51.4 (13.58) |
| Gender, *n* (*%*) |  |  |
| Female | 159 (56.4) | 44 (80.0) |
| Male | 122 (43.3) | 11 (20.0) |
| Not answered | 1 (0.3) |  |
| Race/ethnicity, *n* (*%*) |  |  |
| Asian | 147 (52.1) |  |
| Caucasian | 95 (33.7) |  |
| Indian | 7 (2.5) |  |
| Sri Lankan | 7 (2.4) |  |
| Middle Eastern | 4 (1.4) |  |
| Black/African/Caribbean | 3 (1.2) |  |
| Aboriginal or Torres Strait Islander | 3 (1.2) |  |
| Other | 14 (4.8) |  |
| Not answered | 2 (0.7) |  |
| English as first language, *n* (*%*) |  | 47 (85.5) |
| Relationship status, *n* (*%*) |  |  |
| Single, never married | 234 (83.0) |  |
| In an intimate relationship, not living together | 46 (16.3) |  |
| Married or partnered | 0 (0.0) |  |
| Separated/divorced/widowed | 0 (0.0) |  |
| Not answered | 2 (0.7) |  |
| Highest level of education completed, *n* (*%*) |  |  |
| High school |  | 3 (5.5) |
| Certificate or diploma |  | 9 (16.4) |
| Undergraduate degree |  | 18 (32.7) |
| Postgraduate degree |  | 25 (45.5) |
|  | | |

| Table 2  *Standardized Factor Loadings for a Nested-Factor Confirmatory Model of the MAQ* | | | | |  |
| --- | --- | --- | --- | --- | --- |
| Item | | Formal | Informal | Practice | Total |
| 3. | When meditating, how much of the time was your attention focused on what you intended to focus on (body, breath, sounds, etc.)? | .507 |  | .252 | .759 |
| 4. | When meditating, how much of the time were you noticing when you were getting distracted? | .511 |  | .230 | .741 |
| 5. | When meditating, how much of the time were you practicing an accepting attitude toward what you were experiencing? | .544 |  | .250 | .794 |
| 6. | When meditating, how much of the time were you practicing being gentle and compassionate toward yourself? | .526 |  | .263 | .789 |
| 7. | In your daily life, how much of the time were you practicing paying attention to everyday activities (e.g., eating, walking, chores, communicating etc.)? |  | .294 | .310 | .604 |
| 8. | In your daily life, how much of the time were you practicing paying attention while working or studying? |  | .268 | .319 | .587 |
| 9. | In your daily life, how much of the time were you practicing bringing your attention back to what you were doing when it wandered off? |  | .280 | .337 | .617 |
| 10. | In your daily life, how much of the time were you practicing being aware of your thoughts, emotions and reactions? |  | .265 | .329 | .594 |
| 11. | In your daily life, how much of the time were you practicing bringing an accepting attitude towards what you were experience? |  | .270 | .337 | .607 |
| 12. | In your daily life, how much of the time were you practicing being gentle and compassionate toward yourself? |  | .268 | .330 | .598 |
| *Note.* All factor loadings are significant at the *p* < .001 level. MAQ = Mindfulness Adherence Questionnaire. | | | | |  |
